# Supplementary material for: Effect of a mass radio campaign on family behaviours and child survival in Burkina Faso: a repeated cross-sectional, cluster-randomised trial
Source: PubMed Central journal article supplement (PMC5817351; doi:10.1016/s2214-109x(18)30004-4), 2018-02-09
Supplement: mmc1.pdf [file mmc1.pdf]

# THE LANCET

## Global Health

### Supplementary appendix

This appendix formed part of the original submission and has been peer reviewed. We post it as supplied by the authors.

Supplement to: Sarrassat S, Meda N, Badolo H, et al. Effect of a mass radio campaign on family behaviours and child survival in Burkina Faso: a repeated cross-sectional, cluster-randomised trial. *Lancet Glob Health* 2018; **6**: e330–41.

Table 1: Other major programs implemented in intervention and control clusters

| Cluster                   | International NGOs / programs                                                                                                                               | # local OBCE |
|---------------------------|-------------------------------------------------------------------------------------------------------------------------------------------------------------|--------------|
| Banfora                   | CREPA; Progetto Mondo MLAL                                                                                                                                  | 6            |
| Bogande                   | ACF; GRET (Nutrifaso program); Helvetas (Sanifaso program); UNICEF                                                                                          | 6            |
| Djibo                     | Croix Rouge; CRUS; DRC; Hunger Project                                                                                                                      | 3            |
| Kantchari                 | ACF                                                                                                                                                         | 1            |
| Ouahigouya                | -                                                                                                                                                           | 5            |
| Sapouy                    | Hunger Project; MSI; PAM; UNICEF                                                                                                                            | 0            |
| Solenzo                   | SOS Sahel                                                                                                                                                   | 2            |
| All intervention clusters | ACF; CREPA; Croix Rouge; CRUS; DRC; Hunger Project; MSI; GRET (Nutrifaso program); PAM; Progetto Mondo MLAL; Helvetas (Sanifaso program); SOS Sahel; UNICEF | 23           |
| Boromo                    | Water Aid (Sanifaso program)                                                                                                                                | 4            |
| Gayeri                    | HKI; GRET (Nutrifaso program); PAM                                                                                                                          | 3            |
| Kongoussi                 | Plan International (PAASAD program); SOS Sahel                                                                                                              | 5            |
| Koudougou                 | GIZ; PAM; Water Aid (Sanifaso program); USAID                                                                                                               | 5            |
| Nouna                     | MSI; PAM; SOS Sahel                                                                                                                                         | 4            |
| Po                        | -                                                                                                                                                           | 3            |
| Pouytenga                 | Medicus Mundi; Plan International (PAASAD program)                                                                                                          | 3            |
| All control clusters      | GIZ; HKI; Medicus Mundi; MSI; GRET (Nutrifaso program); PAM; Plan International (PAASAD program); SOS Sahel; USAID; Water Aid (Sanifaso program)            | 27           |

Table 2: Changes from baseline in self-reported behaviours (ITT analysis)

|                                                                                       | Survey | Control arm |             | Intervention arm |             | "Crude"<br>DiD | Cluster-level DiD analysis       |       |         |                                                       |              |         |      |       |
|---------------------------------------------------------------------------------------|--------|-------------|-------------|------------------|-------------|----------------|----------------------------------|-------|---------|-------------------------------------------------------|--------------|---------|------|-------|
|                                                                                       |        | total       | %           | total            | %           |                | Adjusted for baseline prevalence |       |         | Adjusted for baseline prevalence and confounder score |              |         |      |       |
|                                                                                       |        |             |             |                  |             |                | DiD                              | 95%CI | P-value | DiD                                                   | 95%CI        | P-value |      |       |
| Maternal health                                                                       |        |             |             |                  |             |                |                                  |       |         |                                                       |              |         |      |       |
| 4 or more ANC visits                                                                  | BS     | 2,562       | <b>50.8</b> | 2,470            | <b>37.0</b> |                |                                  |       |         |                                                       |              |         |      |       |
|                                                                                       | ES ITT | 2,378       | <b>56.4</b> | 2,361            | <b>41.7</b> | -0.9           | <b>-7.9</b>                      | -23.0 | 7.3     | 0.440                                                 | <b>-4.8</b>  | -23.8   | 14.1 | 0.729 |
| Saving during the pregnancy                                                           | BS     | 2,562       | <b>62.8</b> | 2,474            | <b>56.4</b> |                |                                  |       |         |                                                       |              |         |      |       |
|                                                                                       | ES ITT | 2,378       | <b>63.2</b> | 2,361            | <b>63.9</b> | 7.1            | <b>8.9</b>                       | -0.9  | 18.7    | 0.061                                                 | <b>14.2</b>  | 2.4     | 25.9 | 0.053 |
| Health facility delivery                                                              | BS     | 2,562       | <b>81.8</b> | 2,470            | <b>56.0</b> |                |                                  |       |         |                                                       |              |         |      |       |
|                                                                                       | ES ITT | 2,378       | <b>89.7</b> | 2,361            | <b>69.8</b> | 5.9            | <b>4.9</b>                       | -14.1 | 23.9    | 0.515                                                 | <b>3.3</b>   | -16.9   | 23.5 | 0.638 |
| Newborn health                                                                        |        |             |             |                  |             |                |                                  |       |         |                                                       |              |         |      |       |
| Breastfeeding initiation within 1 hour after birth                                    | BS     | 2,556       | <b>32.6</b> | 2,463            | <b>26.8</b> |                |                                  |       |         |                                                       |              |         |      |       |
|                                                                                       | ES ITT | 2,342       | <b>32.6</b> | 2,316            | <b>35.4</b> | 8.6            | <b>7.7</b>                       | -15.0 | 30.3    | 0.491                                                 | <b>22.0</b>  | -14.4   | 58.5 | 0.360 |
| First bath delayed for 24 hours or more after birth                                   | BS     | 2,556       | <b>55.9</b> | 2,463            | <b>49.3</b> |                |                                  |       |         |                                                       |              |         |      |       |
|                                                                                       | ES ITT | 2,358       | <b>50.8</b> | 2,331            | <b>39.2</b> | -5.0           | <b>-3.2</b>                      | -11.2 | 4.9     | 0.398                                                 | <b>-1.2</b>  | -12.8   | 10.5 | 0.722 |
| Health care seeking in a health facility or with a CHW (two weeks prior to interview) |        |             |             |                  |             |                |                                  |       |         |                                                       |              |         |      |       |
| Fever, fast/difficult breathing or diarrhoea                                          | BS     | 1,072       | <b>57.4</b> | 975              | <b>43.2</b> |                |                                  |       |         |                                                       |              |         |      |       |
|                                                                                       | ES ITT | 822         | <b>62.2</b> | 830              | <b>51.6</b> | 3.6            | <b>1.9</b>                       | -18.5 | 22.4    | 0.812                                                 | <b>0.6</b>   | -22.9   | 24.2 | 0.931 |
| Fever                                                                                 | BS     | 735         | <b>63.7</b> | 637              | <b>50.2</b> |                |                                  |       |         |                                                       |              |         |      |       |
|                                                                                       | ES ITT | 582         | <b>73.5</b> | 572              | <b>58.2</b> | -1.8           | <b>-0.3</b>                      | -18.3 | 17.7    | 0.973                                                 | <b>-3.2</b>  | -24.7   | 18.2 | 0.716 |
| Fast/difficult breathing                                                              | BS     | 302         | <b>56.6</b> | 381              | <b>44.4</b> |                |                                  |       |         |                                                       |              |         |      |       |
|                                                                                       | ES ITT | 281         | <b>54.1</b> | 244              | <b>41.8</b> | -0.1           | <b>-5.0</b>                      | -27.3 | 17.3    | 0.656                                                 | <b>-8.3</b>  | -38.1   | 21.4 | 0.532 |
| Diarrhoea                                                                             | BS     | 559         | <b>57.8</b> | 514              | <b>44.9</b> |                |                                  |       |         |                                                       |              |         |      |       |
|                                                                                       | ES ITT | 357         | <b>64.4</b> | 370              | <b>54.1</b> | 2.6            | <b>2.6</b>                       | -16.0 | 21.2    | 0.750                                                 | <b>-0.9</b>  | -22.8   | 21.0 | 0.923 |
| Treatment (two weeks prior to interview)                                              |        |             |             |                  |             |                |                                  |       |         |                                                       |              |         |      |       |
| ACT or quinine IM/IV for fever                                                        | BS     | 735         | <b>17.3</b> | 639              | <b>16.9</b> |                |                                  |       |         |                                                       |              |         |      |       |
|                                                                                       | ES ITT | 613         | <b>39.3</b> | 587              | <b>27.6</b> | -11.3          | <b>-11.3</b>                     | -27.6 | 4.9     | 0.131                                                 | <b>-11.3</b> | -34.4   | 11.8 | 0.472 |
| Antibiotic for fast/difficult breathing                                               | BS     | 302         | <b>28.2</b> | 382              | <b>27.0</b> |                |                                  |       |         |                                                       |              |         |      |       |
|                                                                                       | ES ITT | 284         | <b>35.6</b> | 244              | <b>25.8</b> | -8.6           | <b>-8.5</b>                      | -33.7 | 16.6    | 0.488                                                 | <b>-8.3</b>  | -44.2   | 27.5 | 0.884 |
| ORS or more liquids for diarrhoea                                                     | BS     | 560         | <b>41.1</b> | 516              | <b>30.6</b> |                |                                  |       |         |                                                       |              |         |      |       |
|                                                                                       | ES ITT | 371         | <b>49.6</b> | 376              | <b>39.6</b> | 0.5            | <b>-8.2</b>                      | -18.0 | 1.6     | 0.062                                                 | <b>-10.4</b> | -22.8   | 1.9  | 0.471 |
| Home-made solutions for diarrhoea                                                     | BS     | 560         | <b>6.8</b>  | 516              | <b>6.8</b>  |                |                                  |       |         |                                                       |              |         |      |       |
|                                                                                       | ES ITT | 371         | <b>9.7</b>  | 376              | <b>4.0</b>  | -5.7           | <b>-4.8</b>                      | -18.2 | 8.6     | 0.608                                                 | <b>-15.8</b> | -30.8   | -0.7 | 0.297 |

| Nutrition                                                        |        |       |             |       |             |      |             |       |      |       |              |       |      |
|------------------------------------------------------------------|--------|-------|-------------|-------|-------------|------|-------------|-------|------|-------|--------------|-------|------|
| Exclusive breastfeeding (day prior to interview, 0-5 months old) | BS     | 429   | <b>44.6</b> | 450   | <b>42.4</b> |      |             |       |      |       |              |       |      |
|                                                                  | ES ITT | 525   | <b>54.9</b> | 490   | <b>58.8</b> | 6.1  | <b>7.8</b>  | -11.9 | 27.4 | 0.423 | <b>6.1</b>   | -21.6 | 33.7 |
| Complementary feeding (day prior to interview, 6-11 months old)  | BS     | 418   | <b>55.5</b> | 411   | <b>49.9</b> |      |             |       |      |       |              |       |      |
|                                                                  | ES ITT | 546   | <b>63.6</b> | 536   | <b>60.1</b> | 2.1  | <b>-0.2</b> | -17.2 | 16.7 | 0.982 | <b>-11.2</b> | -30.7 | 8.3  |
| Growth monitoring (past 6 months, 0-23 months old)               | BS     | 1,525 | <b>59.7</b> | 1,615 | <b>51.1</b> |      |             |       |      |       |              |       |      |
|                                                                  | ES ITT | 1,940 | <b>68.3</b> | 1,904 | <b>51.1</b> | -8.6 | <b>-9.4</b> | -22.5 | 3.6  | 0.145 | <b>-7.7</b>  | -24.9 | 9.6  |
| Bed net use                                                      |        |       |             |       |             |      |             |       |      |       |              |       |      |
| Children under an ITN the night prior to interview               | BS     | 2,567 | <b>60.3</b> | 2,475 | <b>58.5</b> |      |             |       |      |       |              |       |      |
|                                                                  | ES ITT | 2,886 | <b>68.2</b> | 2,784 | <b>68.1</b> | 1.7  | <b>-0.1</b> | -10.6 | 10.3 | 0.972 | <b>-1.2</b>  | -15.7 | 13.2 |
| Women under a net during their last pregnancy                    | BS     | 2,560 | <b>65.6</b> | 2,468 | <b>62.5</b> |      |             |       |      |       |              |       |      |
|                                                                  | ES ITT | 2,886 | <b>67.4</b> | 2,784 | <b>68.9</b> | 4.6  | <b>1.7</b>  | -11.3 | 14.8 | 0.798 | <b>3.6</b>   | -14.6 | 21.8 |
| Sanitation                                                       |        |       |             |       |             |      |             |       |      |       |              |       |      |
| Household latrine ownership                                      | BS     | 2,559 | <b>19.5</b> | 2,458 | <b>25.0</b> |      |             |       |      |       |              |       |      |
|                                                                  | ES ITT | 2,858 | <b>40.6</b> | 2,768 | <b>39.9</b> | -6.2 | <b>-6.8</b> | -24.2 | 10.6 | 0.396 | <b>4.2</b>   | -18.7 | 27.1 |
| Safe disposal of last children's stools †                        | BS     | 2,566 | <b>14.1</b> | 2,475 | <b>15.3</b> |      |             |       |      |       |              |       |      |
|                                                                  | ES ITT | 2,886 | <b>21.7</b> | 2,784 | <b>21.6</b> | -1.3 | <b>-1.2</b> | -6.5  | 4.0  | 0.640 | <b>1.1</b>   | -6.3  | 8.5  |
| HWWS the last time women cleaned her child who defecated         | BS     | 2,535 | <b>37.5</b> | 2,401 | <b>36.4</b> |      |             |       |      |       |              |       |      |
|                                                                  | ES ITT | 2,733 | <b>42.6</b> | 2,688 | <b>44.1</b> | 2.6  | <b>1.7</b>  | -8.6  | 12.1 | 0.713 | <b>-2.2</b>  | -16.0 | 11.6 |

BS: Baseline survey; ES: Endline survey; ITT: Intention-To-Treat analysis

† defined when the child used a latrine or when the stool was thrown into them or buried

Table 3: Effect modification by radio ownership on all-cause post-neonatal under-five child mortality (ITT analysis)

| Period                                      | Control arm |        | Intervention arm |              | Cluster-level analysis              |        |             | Cluster-level analysis                                   |        |           |             |      |      |       |
|---------------------------------------------|-------------|--------|------------------|--------------|-------------------------------------|--------|-------------|----------------------------------------------------------|--------|-----------|-------------|------|------|-------|
|                                             | Risk        | 95% CI | Risk             | 95% CI       | Adjusted for pre-intervention level |        | P-value †   | Adjusted for pre-intervention level and confounder score |        | P-value † |             |      |      |       |
|                                             |             |        |                  |              | RR                                  | 95% CI |             | RR                                                       | 95% CI |           |             |      |      |       |
| No radio                                    |             |        |                  |              |                                     |        |             |                                                          |        |           |             |      |      |       |
| Mar 2010 - Feb 2012                         | <b>92.1</b> | 64.9   | 119.3            | <b>127.6</b> | 105.2                               | 150.0  | -           | -                                                        | -      | -         | -           | -    | -    |       |
| Mar 2012 - Oct 2014                         | <b>80.9</b> | 58.7   | 103.2            | <b>99.9</b>  | 81.1                                | 118.8  | <b>0.63</b> | 0.34                                                     | 1.17   | 0.164     | <b>0.63</b> | 0.30 | 1.31 | 0.164 |
| Radio in the compound, not in the household |             |        |                  |              |                                     |        |             |                                                          |        |           |             |      |      |       |
| Mar 2010 - Feb 2012                         | <b>90.3</b> | 75.5   | 105.0            | <b>123.7</b> | 91.8                                | 155.6  | -           | -                                                        | -      | -         | -           | -    | -    |       |
| Mar 2012 - Oct 2014                         | <b>79.3</b> | 62.4   | 96.2             | <b>108.8</b> | 81.4                                | 136.1  | <b>0.98</b> | 0.76                                                     | 1.27   | 0.92      | <b>0.92</b> | 0.69 | 1.24 |       |
| Radio in the household                      |             |        |                  |              |                                     |        |             |                                                          |        |           |             |      |      |       |
| Mar 2010 - Feb 2012                         | <b>94.7</b> | 70.4   | 119.0            | <b>124.7</b> | 103.6                               | 145.9  | -           | -                                                        | -      | -         | -           | -    | -    |       |
| Mar 2012 - Oct 2014                         | <b>66.3</b> | 49.1   | 83.5             | <b>97.5</b>  | 81.8                                | 113.2  | <b>1.07</b> | 0.88                                                     | 1.30   | 1.02      | <b>1.02</b> | 0.82 | 1.28 |       |

† P-value for effect modification by radio ownership

Table 4: Effect modification by radio ownership on self-reported care seeking (ITT analysis)

| Survey                                                                                         | Control arm                                 |             | Intervention arm |             | "Crude"<br>DiD | Cluster-level DiD analysis       |             |                      |                                                       | Cluster-level DiD analysis |                      |       |      |       |
|------------------------------------------------------------------------------------------------|---------------------------------------------|-------------|------------------|-------------|----------------|----------------------------------|-------------|----------------------|-------------------------------------------------------|----------------------------|----------------------|-------|------|-------|
|                                                                                                | Total                                       | %           | Total            | %           |                | Adjusted for baseline prevalence |             | P-value <sup>†</sup> | Adjusted for baseline prevalence and confounder score |                            | P-value <sup>†</sup> |       |      |       |
|                                                                                                |                                             |             |                  |             |                | DiD                              | 95% CI      |                      | DiD                                                   | 95% CI                     |                      |       |      |       |
| No radio                                                                                       |                                             |             |                  |             |                |                                  |             |                      |                                                       |                            |                      |       |      |       |
| Care seeking in a health facility or with CHW for fever, fast/difficult breathing or diarrhoea | BS                                          | 219         | <b>55.3</b>      | 119         | <b>43.7</b>    | -                                | -           | -                    | -                                                     | -                          | -                    | -     | -    | -     |
|                                                                                                | ES ITT                                      | 180         | <b>68.9</b>      | 142         | <b>45.8</b>    | -11.5                            | <b>-5.9</b> | -32.8                | 21.0                                                  | 0.204                      | <b>-5.6</b>          | -31.5 | 20.3 | 0.204 |
|                                                                                                | Radio in the compound, not in the household |             |                  |             |                |                                  |             |                      |                                                       |                            |                      |       |      |       |
|                                                                                                | BS                                          | 164         | <b>53.1</b>      | 236         | <b>44.5</b>    | -                                | -           | -                    | -                                                     | -                          | -                    | -     | -    | -     |
|                                                                                                | ES ITT                                      | 157         | <b>64.3</b>      | 209         | <b>45.9</b>    | -9.8                             | <b>-7.8</b> | -35.2                | 19.6                                                  |                            | <b>-7.5</b>          | -31.9 | 16.9 |       |
|                                                                                                | Radio in the household                      |             |                  |             |                |                                  |             |                      |                                                       |                            |                      |       |      |       |
| BS                                                                                             | 687                                         | <b>59.1</b> | 618              | <b>42.7</b> | -              | -                                | -           | -                    | -                                                     | -                          | -                    | -     | -    |       |
| ES ITT                                                                                         | 476                                         | <b>59.2</b> | 475              | <b>55.8</b> | 13.0           | <b>7.8</b>                       | -10.7       | 26.3                 |                                                       | <b>8.1</b>                 | -12.5                | 28.7  |      |       |

† P-value for effect modification by radio ownership

Table 5: Effect modification by distance to the closest facility on self-reported care seeking (ITT analysis)

| Survey                                                                  | Control arm |             | Intervention arm |             | "Crude"<br>DiD | Cluster-level DiD analysis       |             |                      |                                                       | Cluster-level DiD analysis |                      |      |      |       |
|-------------------------------------------------------------------------|-------------|-------------|------------------|-------------|----------------|----------------------------------|-------------|----------------------|-------------------------------------------------------|----------------------------|----------------------|------|------|-------|
|                                                                         | Total       | %           | Total            | %           |                | Adjusted for baseline prevalence |             | P-value <sup>†</sup> | Adjusted for baseline prevalence and confounder score |                            | P-value <sup>†</sup> |      |      |       |
|                                                                         |             |             |                  |             |                | DiD                              | 95% CI      |                      | DiD                                                   | 95% CI                     |                      |      |      |       |
| < 2 km                                                                  |             |             |                  |             |                |                                  |             |                      |                                                       |                            |                      |      |      |       |
| Care seeking in a CSPS for fever, fast/difficult breathing or diarrhoea | BS          | 386         | <b>64.5</b>      | 180         | <b>43.3</b>    | -                                | -           | -                    | -                                                     | -                          | -                    | -    | -    |       |
|                                                                         | ES ITT      | 300         | <b>61.7</b>      | 133         | <b>58.7</b>    | 18.2                             | <b>17.2</b> | -4.4                 | 38.8                                                  | 0.003                      | <b>22.7</b>          | -1.8 | 47.1 | 0.004 |
|                                                                         | 2 - 5 km    |             |                  |             |                |                                  |             |                      |                                                       |                            |                      |      |      |       |
|                                                                         | BS          | 353         | <b>49.3</b>      | 277         | <b>40.4</b>    | -                                | -           | -                    | -                                                     | -                          | -                    | -    | -    |       |
|                                                                         | ES ITT      | 298         | <b>54.0</b>      | 199         | <b>51.8</b>    | 6.7                              | <b>8.7</b>  | -9.2                 | 26.5                                                  |                            | <b>14.1</b>          | -5.5 | 33.7 |       |
|                                                                         | > 5 km      |             |                  |             |                |                                  |             |                      |                                                       |                            |                      |      |      |       |
| BS                                                                      | 333         | <b>28.2</b> | 518              | <b>37.6</b> | -              | -                                | -           | -                    | -                                                     | -                          | -                    | -    |      |       |
| ES ITT                                                                  | 224         | <b>49.6</b> | 498              | <b>41.2</b> | -17.8          | <b>-20.1</b>                     | -44.2       | 4.1                  |                                                       | <b>-13.7</b>               | -39.1                | 11.8 |      |       |

† P-value for effect modification by distance to the closest facility
